# Supplementary material
Source: Springer Nature journal article supplement (https://www.springermedizin.de/resource/supplementary/12947_2006_118_MOESM3_ESM.pdf/9556248)

HI: 1.6  
S3  
15 MAR 86  
12:32:48  
3/2/E/HS  
C.N.R FISILOGIA  
CLINICA  
ADULTI 1

RF298368

8:48:32  
GUAD 55  
COMP 66  
184BPH

17CM  
64HZ

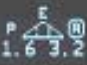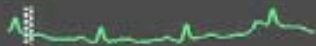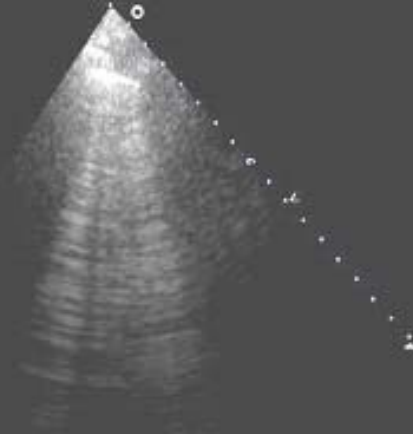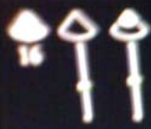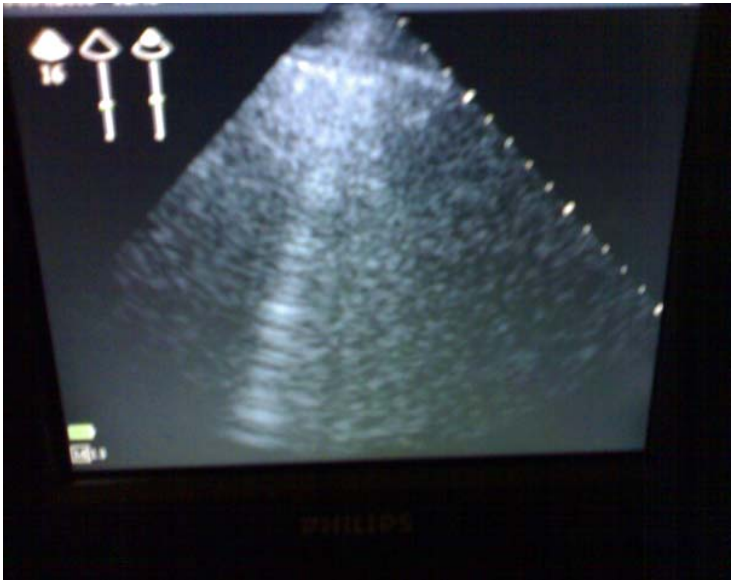

PHILIPS

Supplement: MOESM3 [file 9556248]
